# Supplementary material for: Antiviral Activity of an Endogenous Parvoviral Element
Source: Viruses. 2023 Jun 23;15(7):1420. doi: 10.3390/v15071420 (PMC10384997; doi:10.3390/v15071420)
Supplement: Supplementary file 1 [file viruses-15-01420-s001.zip › viruses-2466904-supplementary.pdf]

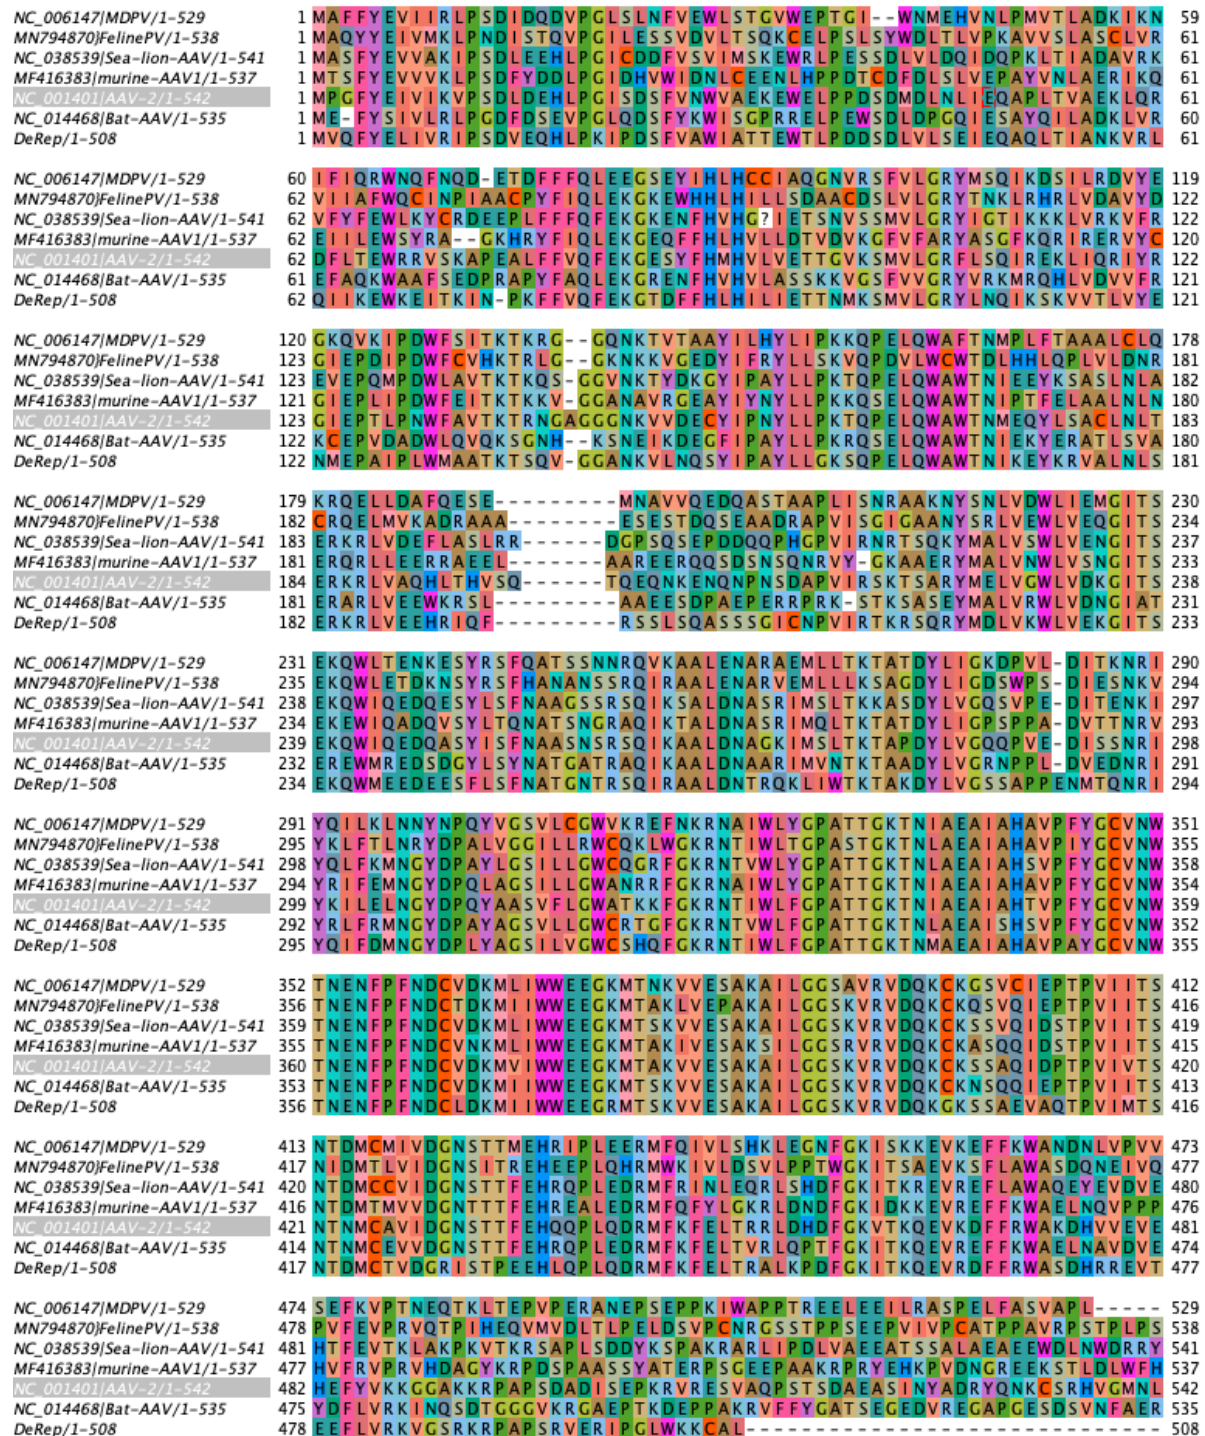

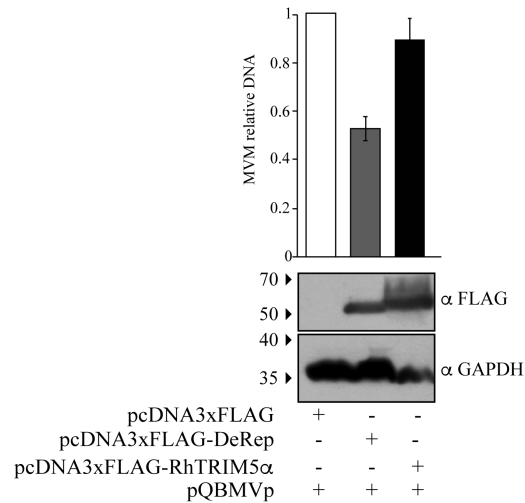

**Figure Supplementary 2. MVM DNA is reduced in the presence of FLAG-DeRep but not in the presence of FLAG-TRIM5α.** Quantification of viral DNA in HEK293T cells co-transfected with an empty vector, FLAG-DeRep or FLAG-TRIM5α (rhesus monkey) coding vector and the MVM molecular clone pQBMVp. The average of 2 experiments is shown. The expression of FLAG-DeRep and FLAG-TRIM5α was confirmed by western blot with anti-FLAG antibody, tubulin was used as loading control. The migration of molecular weight marker is indicated on the right-hand side.
